# Supplementary material for: Methane hydrate efficient formation in a 3D-rGO/SDBS composite
Source: Royal Society of Chemistry journal article supplement (doi:10.1039/d3ra08478g), 2024-01-01
Supplement: d3ra08478g1.pdf [file d3ra08478g1.pdf]

ARTICLE

## Methane Hydrate Efficient Formation in the 3D-rGO/SDBS Composite

Received 00th January 20xx,  
Accepted 00th January 20xx

Meijiao Wang,<sup>a</sup> Shaojiu Yan,<sup>\*ab</sup> Nan Wang,<sup>b</sup> Wen Ge<sup>c</sup> and Wei Zhang<sup>a</sup>

DOI: 10.1039/x0xx00000x

### 1 Contents

Fig. S1 Infrared spectra of GO.

Fig. S2 Induction time of methane hydrate formation with 3D-rGO/SDBS of different additions.

Fig. S3  $t_{90}$  of methane hydrate formation with 3D-rGO/SDBS of different additions.

Fig. S4 Gas storage capacity of methane hydrate formation with 3D-rGO/SDBS of different additions.

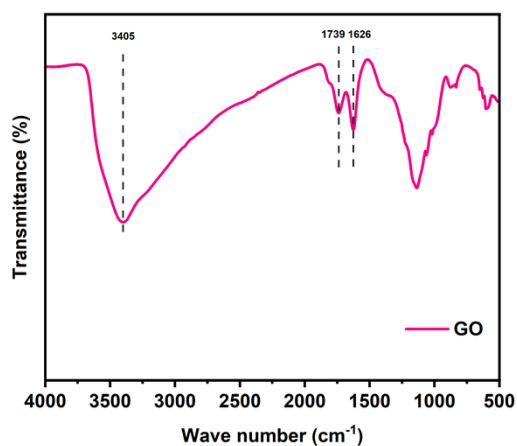

Fig. S1 Infrared spectra of GO.

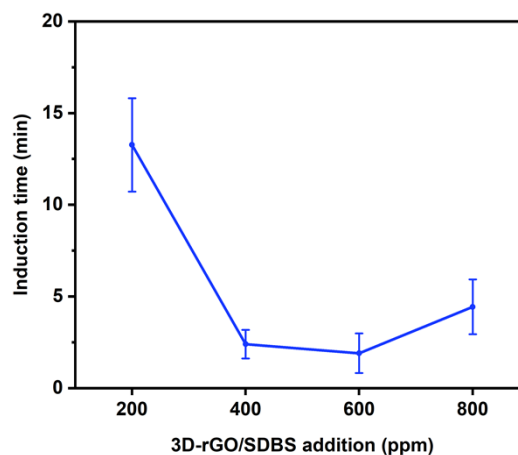

Fig. S2 Induction time of methane hydrate formation with 3D-rGO/SDBS of different additions.

<sup>a</sup> Key Laboratory of Geological Survey and Evaluation of Ministry of Education, China University of Geosciences, Wuhan 430074, China. E-mail: shaojiuyan@126.com (S.Y.); wangmeijiao@cug.edu.cn (M.W.).

<sup>b</sup> Research Centre of Graphene Applications, AECC Beijing Institute of Aeronautical Materials, Beijing 100095, China.

<sup>c</sup> Faculty of Materials Science and Chemistry, China University of Geosciences, Wuhan 430078, China.

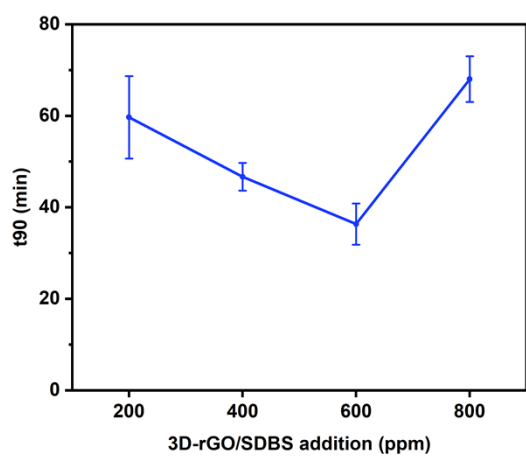

Fig. S3  $t_{90}$  of methane hydrate formation with 3D-rGO/SDBS of different additions.

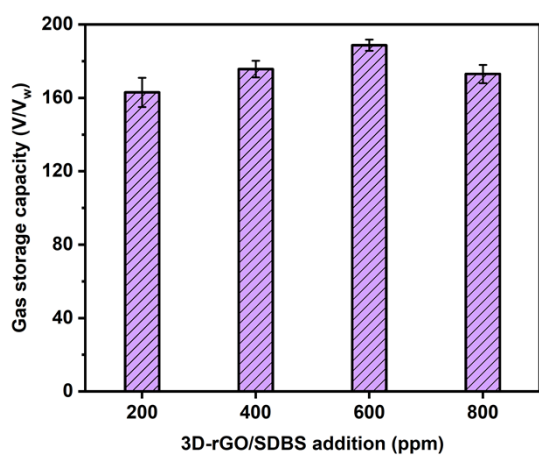

Fig. S4 Gas storage capacity of methane hydrate formation with 3D-rGO/SDBS of different additions.
